# Supplementary material for: Bi4O5I2 flower/Bi2S3 nanorod heterojunctions for significantly enhanced photocatalytic performance
Source: Royal Society of Chemistry journal article supplement (doi:10.1039/c9ce00697d), 2019-01-01
Supplement: c9ce00697d1.pdf [file c9ce00697d1.pdf]

## *Supplementary Information*

### **Bi<sub>4</sub>O<sub>5</sub>I<sub>2</sub> flower/Bi<sub>2</sub>S<sub>3</sub> nanorod heterojunctions for significantly enhanced photocatalytic performance**

Dongfang Hou, Fan Tang, Bingbing Ma, Min Deng, Xiu-qing Qiao, Yun-Lin Liu, Dong-Sheng Li\*

College of Materials and Chemical Engineering, Key Laboratory of Inorganic Nonmetallic Crystalline and Energy Conversion Materials, China Three Gorges University, Yichang, 443002, China

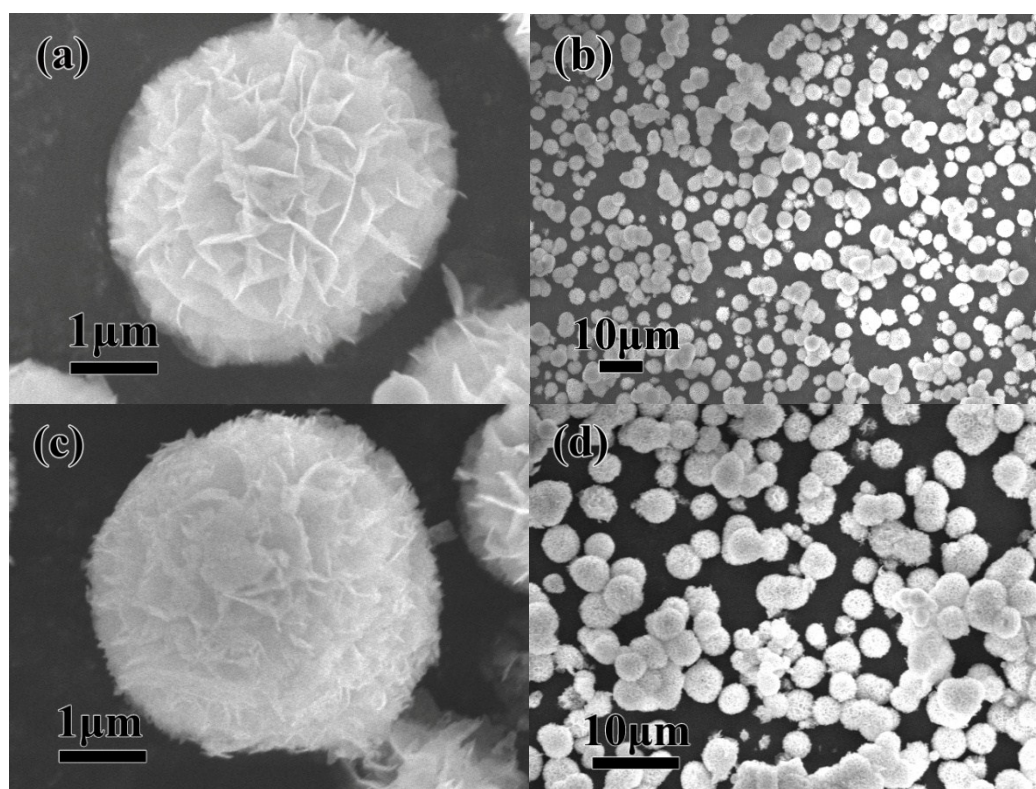

**Fig. S1.** Representative FESEM images of (a) and (b) the precursors, and of (c) and (d) Bi<sub>4</sub>O<sub>5</sub>I<sub>2</sub> microspheres after annealing

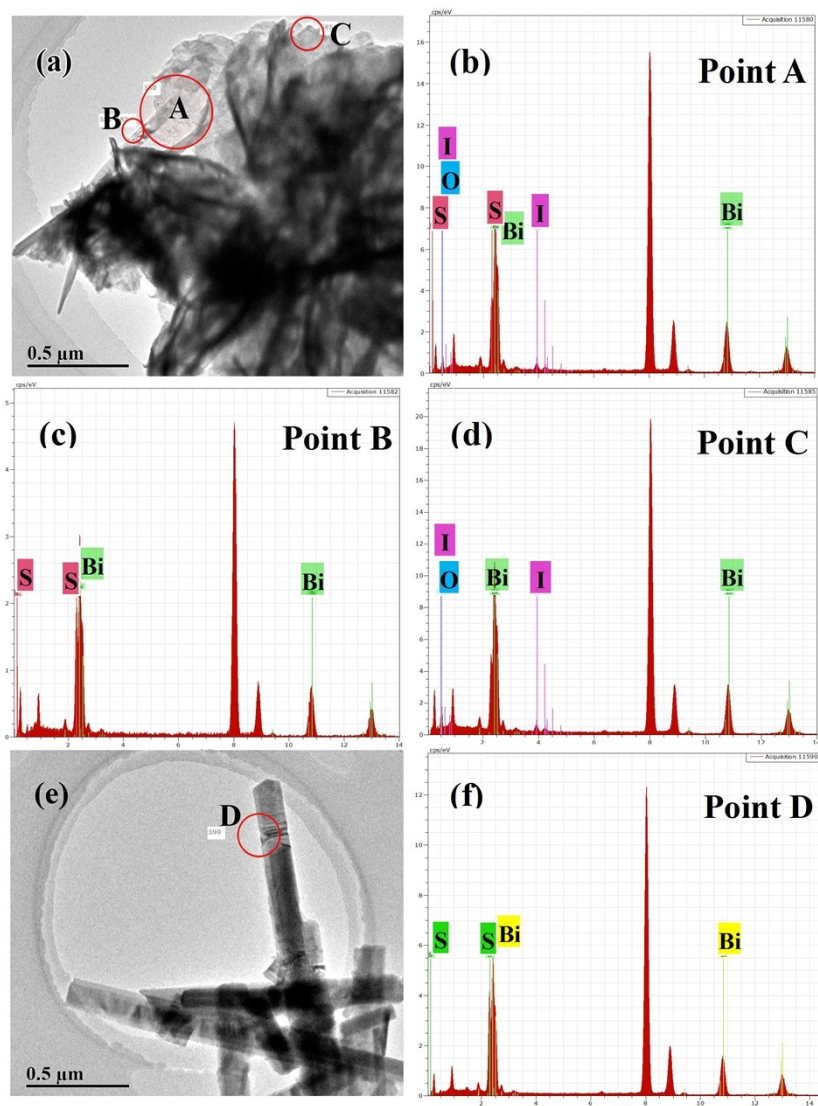

**Fig. S2.** TEM images and the corresponding EDX analysis of (a) BOI-S2, (b) BOI-S2-A, (c) BOI-S2-B, (d) BOI-S2-C, (e) BOI-S4, and (f) BOI-S4-D

It is easy to observe that a large number of  $\text{Bi}_2\text{S}_3$  nanorods grow in situ from the flowers in BOI-S2, as shown in Fig. S2a. The EDX analysis of point A indicates that the existence of elements Bi, O, I, and S, which form the  $\text{Bi}_4\text{O}_5\text{I}_2/\text{Bi}_2\text{S}_3$  heterostructures (Fig. S2b). Fig. S2b and 2c show the EDX results of the single nanorod (point B) and nanoflake (point C), and only  $\text{Bi}_2\text{S}_3$  and  $\text{Bi}_4\text{O}_5\text{I}_2$  have been identified. As for BOI-S4 (Fig. S2e), it is composed of nanorods and no obvious nanoflakes are found and the corresponding EDX analysis verifies that only  $\text{Bi}_2\text{S}_3$  exists (Fig. S2f). All these results are also based on the elements content of the BOI-S2 and BOI-S4 samples determined by EDX in Table S1.

**Table S1** Elements content of the BOI-S2 and BOI-S4 samples determined by EDX

| Samples  | Elements | Norm. C<br>(wt. %) | Atom. C<br>(at. %) |
|----------|----------|--------------------|--------------------|
| BOI-S2-A | Bi       | 82.89              | 44.86              |
|          | S        | 10.76              | 37.96              |
|          | I        | 4.48               | 3.99               |
|          | O        | 1.86               | 13.18              |
| BOI-S2-B | Bi       | 82.32              | 41.68              |
|          | S        | 17.68              | 58.32              |
| BOI-S2-C | Bi       | 91.33              | 60.23              |
|          | I        | 4.64               | 5.04               |
|          | O        | 4.03               | 34.73              |
| BOI-S4-D | Bi       | 81.71              | 40.67              |
|          | S        | 18.29              | 59.33              |

**Table S2** BET surface area and pore parameters

| Samples                                       | BET surface area<br>(m <sup>2</sup> /g) | Mean pore<br>diameter (nm) | Total pore<br>volume (m <sup>3</sup> /g) |
|-----------------------------------------------|-----------------------------------------|----------------------------|------------------------------------------|
| Bi <sub>4</sub> O <sub>5</sub> I <sub>2</sub> | 18.229                                  | 39.021                     | 0.1778                                   |
| BOI-S2                                        | 21.981                                  | 30.079                     | 0.1653                                   |
| BOI-S6                                        | 7.1791                                  | 28.484                     | 0.0511                                   |

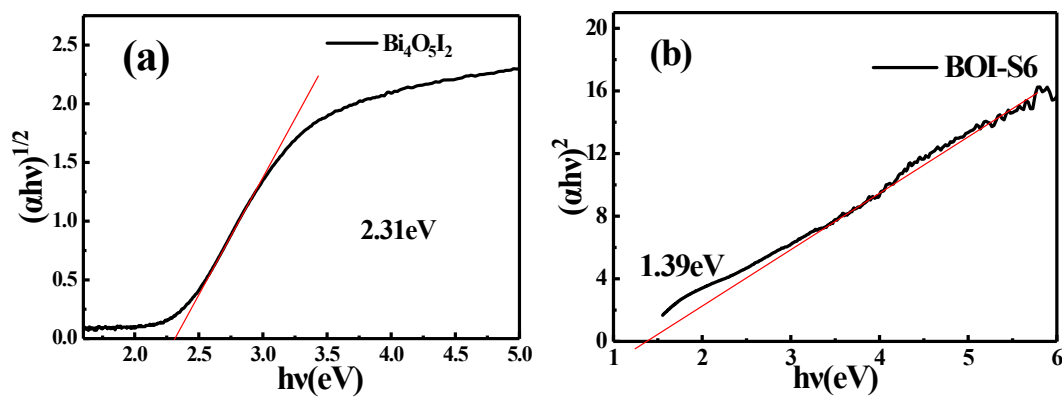**Fig. S3.** The plots of transformed Kubelka–Munk function versus the energy of light for (a)Bi<sub>4</sub>O<sub>5</sub>I<sub>2</sub> and (b) BOI (Bi<sub>2</sub>S<sub>3</sub>).

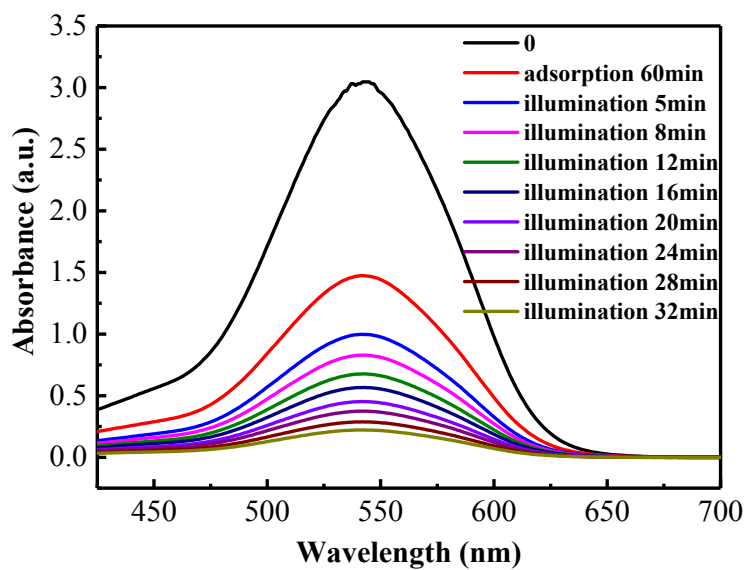

**Fig. S4.** Time-dependent UV-vis absorption spectra of Cr(VI) for BOI-S2

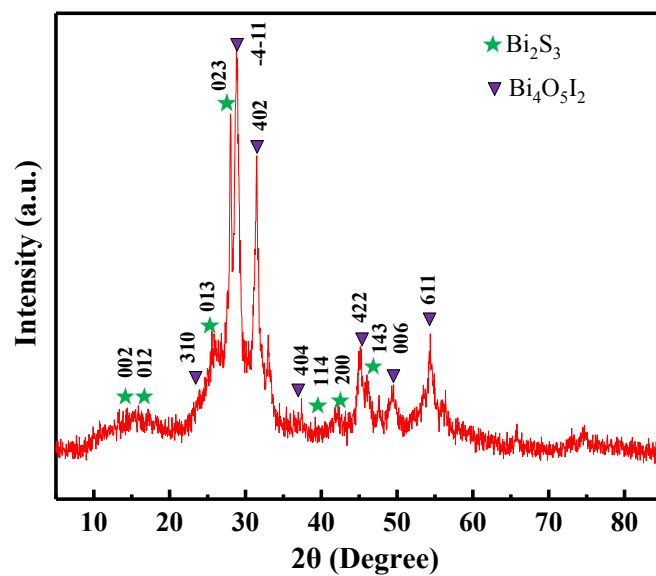

**Fig. S5.** XRD pattern of the  $\text{Bi}_4\text{O}_5\text{I}_2/\text{Bi}_2\text{S}_3$  hetero-nanostructure (sample BOI-S2) after 5 cycles of photoreduction of Cr(VI).

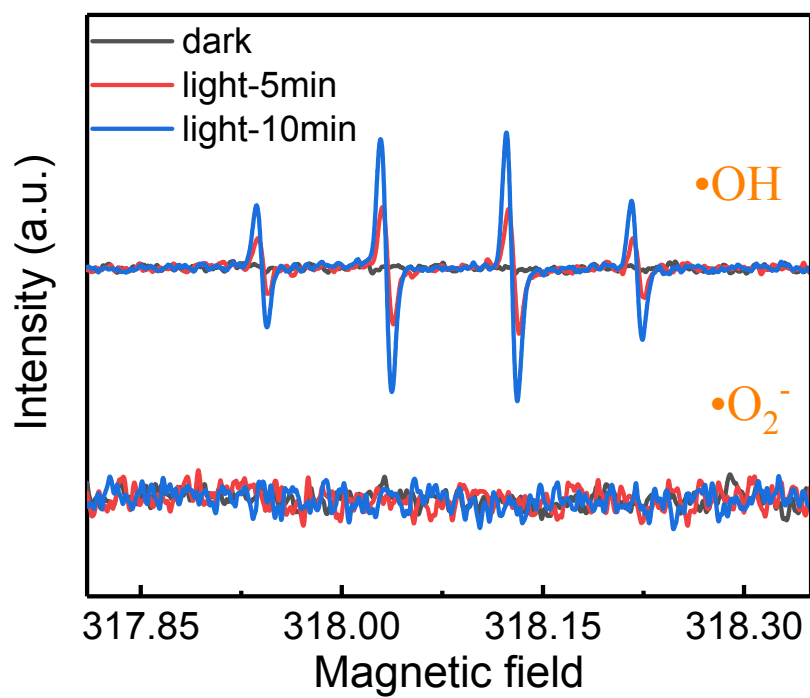

**Fig. S6.** DMPO spin-trapping ESR spectra recorded for  $\bullet\text{OH}$  and  $\bullet\text{O}_2^-$  in the dark and under visible light for BIO-2.
